# Supplementary material for: Solvent-free, deep eutectic system-assisted synthesis of nanoarchitectonics of hierarchical porous carbons for high rate supercapacitors
Source: Royal Society of Chemistry journal article supplement (doi:10.1039/d4qm00489b), 2024-01-01
Supplement: d4qm00489b1.pdf [file d4qm00489b1.pdf]

Electronic Supplementary Material (ESI) for Materials Chemistry Frontiers.

**(Supporting Information)**

For

**Solvent-free, deep eutectic systems assisted synthesis of  
nanoarchitectonics of hierarchical porous carbons for high rate  
supercapacitor**

Jiaxin Wang,<sup>a</sup> Ying Feng,<sup>a</sup> Binbin Tian,<sup>a</sup> Ye Cheng,<sup>a</sup> Encai Ou,<sup>\*a</sup> Huan Li,<sup>\*b</sup> Junfeng Rong<sup>\*b</sup>

<sup>a</sup> College of Chemistry and Chemical Engineering, Hunan University, Changsha 410082, P. R. China.

<sup>b</sup> Sinopec Research Institute of Petroleum Processing Co.,Ltd. Beijing 100083, P. R. China. E-mail: \*

Corresponding author. E-mail address: E-mail: ouencai@hnu.edu.cn (Encai Ou) ;

lihuan.ripp@sinopec.com (Huan Li) ; rongjf.ripp@sinopec.com (Junfeng Rong)

## 2. Experimental Section

### 2.1 Materials:

All reagents are used directly without purification. Polyacrylonitrile(PAN) was purchased from Shanghai Petrochemical, urea (AR), potassium carbonate (AR), and N-methylpyrrolidone (AR) were purchased from China National Pharmaceutical Group, methionine (AR) was purchased from Shanghai Aladdin, and polyvinylidene fluoride (AR) was purchased from Aldrich.

### 2.2 Characterization:

The morphology of carbon materials was analyzed using scanning electron microscopy (Regulus 8100) and transmission electron microscopy (JEM-2100Plus). Thermal Gravimetric Analyzer (DTG-60). X-ray diffraction (XRD-6100, Cu radiation), Raman spectroscopy (Witec Alpha300R, excitation wavelength 488 nm), X-ray photoelectron spectroscopy (XPS, Thermo Fisher ESCALAB Xi<sup>+</sup>), N<sub>2</sub> isothermal adsorption desorption curve (JW-BK200C).

## 2.3 Electrochemical Experiment:

The electrochemical performance of Cyclic voltammetry (CV), Galvanostatic Charge-discharge (GCD), and Electrochemical impedance spectroscopy (EIS) were tested using an electrochemical workstation (Chenhua, Shanghai, CHI660E).

The electroactive material, acetylene black and Polyvinylidene fluoride (PVDF) were mixed with the mass ratio of 8:1:1 in NMP. Then the slurry was coated on the square foam nickel of 1 cm<sup>2</sup>. The average load of the electrode was 1.5 mg cm<sup>-2</sup>. Dry at 100 °C for 12 h, then press under a pressure of 10 MPa for 30 s in a tablet press to obtain the working electrode. In the three-electrode testing system, 6 M KOH was used as the electrolyte, with Pt as the counter electrode and Hg/HgO as the reference electrode. The specific capacity of a single electrode was calculated from the GCD curves based on the following formula:

$$C_g = \frac{I \times \Delta t}{m \times \Delta V}$$

where  $C_g$ ,  $I$ ,  $\Delta t$ ,  $m$ , and  $\Delta V$  are the gravimetric specific capacitance (F g<sup>-1</sup>), discharge current (A), discharge time (s), the mass loading of electroactive material (g), and discharge voltage range (V), respectively.

As for the two-electrode symmetric cell:

$$C_s = \frac{2I \times \Delta t}{m \times \Delta V}$$

where  $C_s$ ,  $I$ ,  $\Delta t$ ,  $m$ , and  $\Delta V$  are the gravimetric specific capacitance of a single electrode (F g<sup>-1</sup>), discharge current (A), discharge time (s), the mass loading of electroactive material (g), and discharge voltage range (V), respectively.

$$C_{\text{cell}} = \frac{C_s}{4}$$

Where  $C_{\text{cell}}$  are the specific capacitance of the symmetric cell.

The energy density ( $E$ , Wh kg<sup>-1</sup>) and power density ( $P$ , W kg<sup>-1</sup>) of the symmetric cell were respectively calculated according to the following equations:

$$E = \frac{C_{\text{cell}} \times (\Delta V)^2}{3.6 \times 2}$$

$$P = \frac{3600 \times E}{\Delta t}$$

## 2.4 Synthetic Process

DES synthesis: Dissolve 0.89 g of methionine and 1.44 g of urea in 20 mL of deionized water, then mix the two solutions together, let them solidify at 0 °C, after that freeze dry the solid to obtain amino acid-urea DES.

Porous carbon nanospheres preparation: Mix 0.4 g PAN, 0.32 g DES, and 0.5 g  $K_2CO_3$  directly through solid-phase stirring to obtain the precursor. The precursor was calcined at 240 °C for 2 h in a tubular furnace under an air atmosphere at a heating rate of 5 °C  $min^{-1}$ , and then in an Ar atmosphere at a heating rate of 5 °C  $min^{-1}$  to the pyrolysis temperature and calcined for 1 h. After completion, the obtained carbon material is first washed with 1 M HCl, then washed with deionized water to neutral, and finally dried at 120 °C for 10 h to obtain porous carbon nanospheres. The prepared porous carbon is named PDKP-X (X=700, 800, 900), where X is the pyrolysis temperature. For comparison, PDP-800 without adding  $K_2CO_3$  and PKP-800 without adding DES were prepared at a pyrolysis temperature of 800 °C.

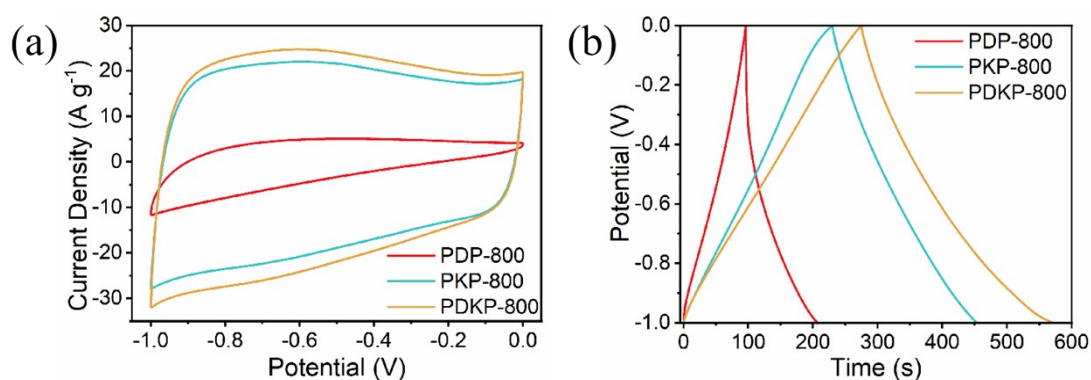

**Fig. S1** (a) CV curves ( $100\ mV\ s^{-1}$ ), (b) GCD curves ( $1\ A\ g^{-1}$ ) of PDP-800, PKP-800 and PDKP-800.

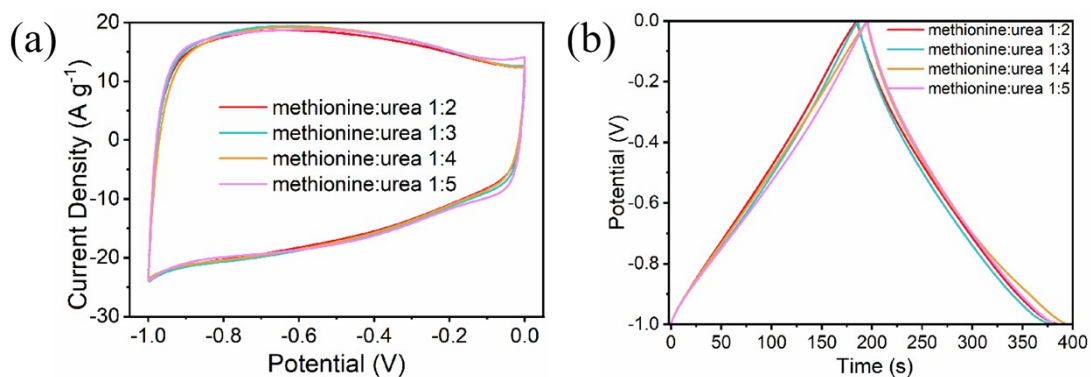

**Fig. S2** (a) Cyclic voltammetry (CV) curves ( $100 \text{ mV s}^{-1}$ ), (b) galvanostatic charge-discharge (GCD) curves ( $1 \text{ A g}^{-1}$ ) of different molar ratios of methionine and urea.

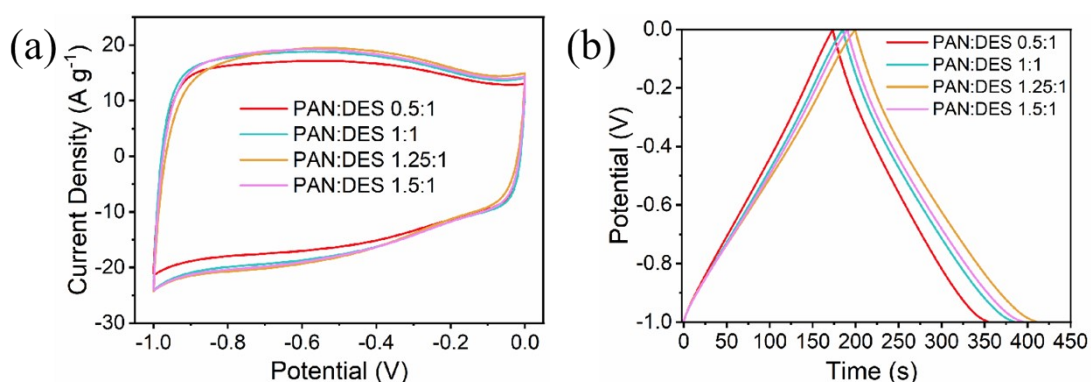

**Fig. S3** (a) CV curves ( $100 \text{ mV s}^{-1}$ ), (b) GCD curves ( $1 \text{ A g}^{-1}$ ) of different mass ratios of PAN and DES.

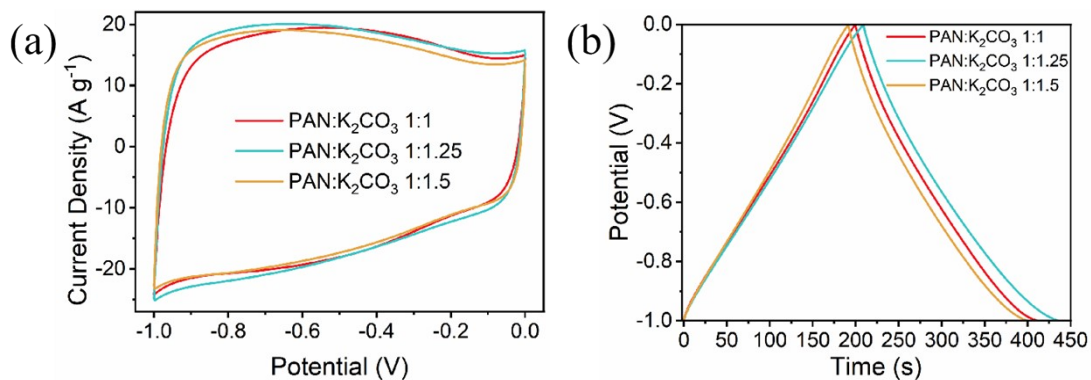

**Fig. S4** (a) CV curves ( $100 \text{ mV s}^{-1}$ ), (b) GCD curves ( $1 \text{ A g}^{-1}$ ) of different mass ratios of PAN and K<sub>2</sub>CO<sub>3</sub>.

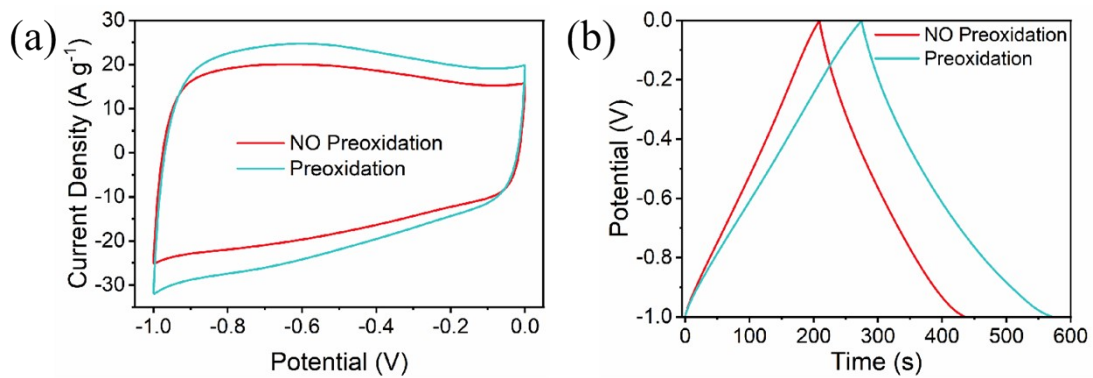

**Fig. S5** (a) CV curves ( $100 \text{ mV s}^{-1}$ ), (b) GCD curves ( $1 \text{ A g}^{-1}$ ) of NO Preoxidation and Preoxidation.

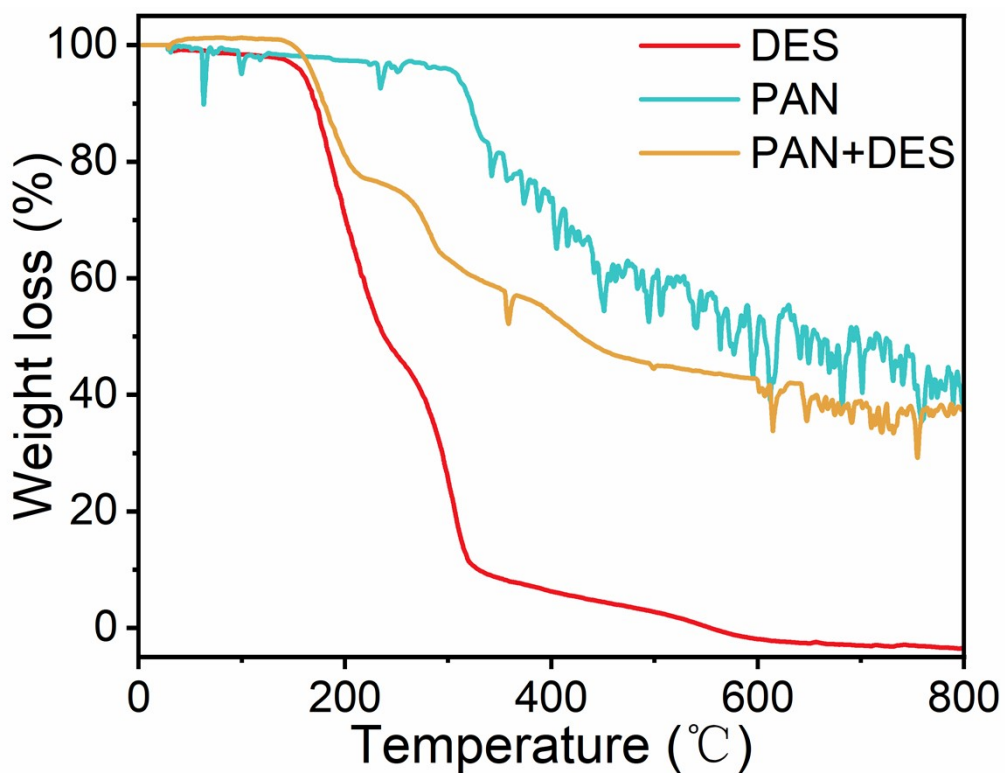

**Fig. S6** TG of DES, PAN and PAN+DES.

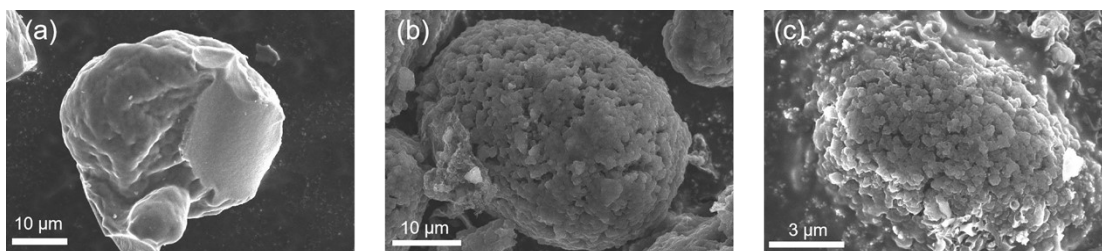

**Fig. S7** (a)-(c) Scanning electron microscopy of PDP-800, PKP-800, and PDKP-800.

**Table S1** Specific capacitances ( $1 \text{ A g}^{-1}$ ) of different molar ratios of methionine and urea, different mass ratios of PAN and DES, different mass ratios of PAN and  $\text{K}_2\text{CO}_3$ ,

NO Preoxidation and Preoxidation

| Samples                             | Specific capacitance ( $\text{F g}^{-1}$ ) |
|-------------------------------------|--------------------------------------------|
| Methionine:Urea 1:2                 | 192.4                                      |
| Methionine:Urea 1:3                 | 193.8                                      |
| Methionine:Urea 1:4                 | 198.3                                      |
| Methionine:Urea 1:5                 | 187                                        |
| PAN:DES 0.5:1                       | 181.4                                      |
| PAN:DES 1:1                         | 198.3                                      |
| PAN:DES 1.25:1                      | 211.5                                      |
| PAN:DES 1.5:1                       | 205.3                                      |
| PAN: $\text{K}_2\text{CO}_3$ 1:1    | 200.9                                      |
| PAN: $\text{K}_2\text{CO}_3$ 1:1.25 | 227.5                                      |
| PAN: $\text{K}_2\text{CO}_3$ 1:1.5  | 208.4                                      |
| NO Preoxidation                     | 227.5                                      |
| Preoxidation                        | 297.3                                      |

**Table S2** Char yield of DES, PAN and PAN+DES.

| Samples | char yield (%) |
|---------|----------------|
| DES     | Less than 3    |
| PAN     | 41             |
| PAN+DES | 38             |

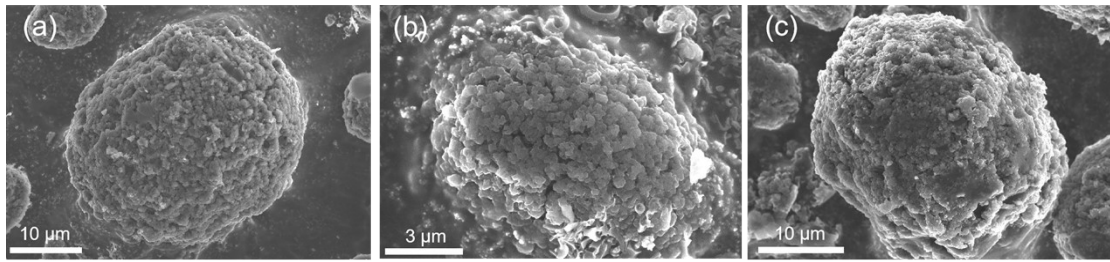

**Fig. S8** (a)-(c) Scanning electron microscopy of PDKP-700, PDKP-800, and PDKP-900.

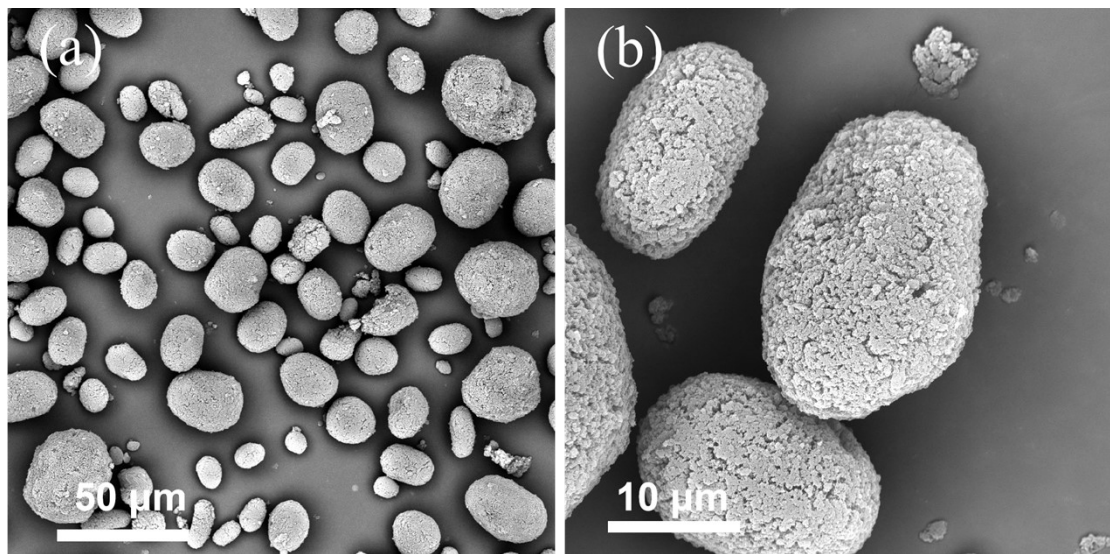

**Fig. S9** Scanning electron microscopy of PAN.

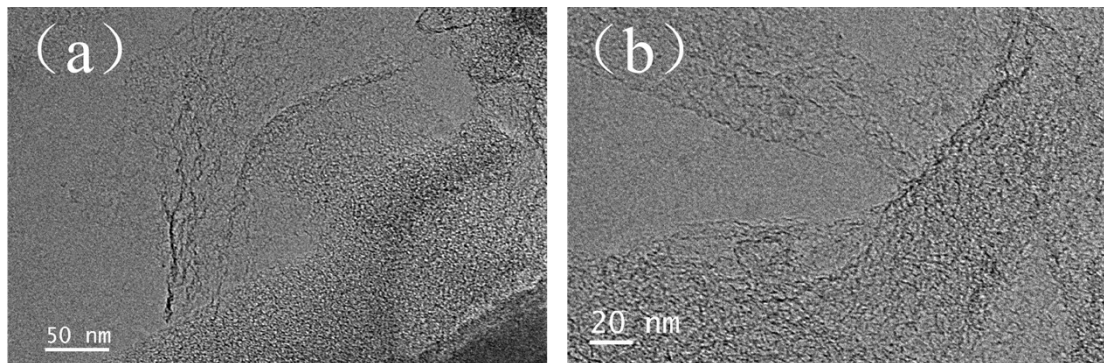

**Fig. S10** high-resolution transmission electron microscopy images of PDKP-800.



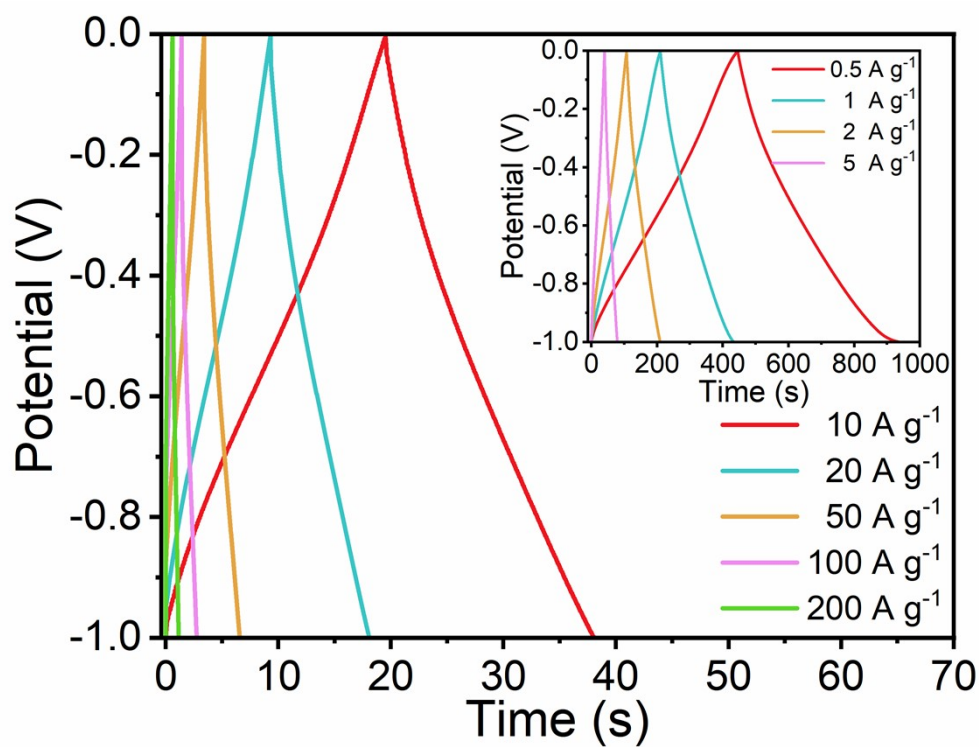

Fig. S11 GCD curves of PDKP-700 at different current densities.

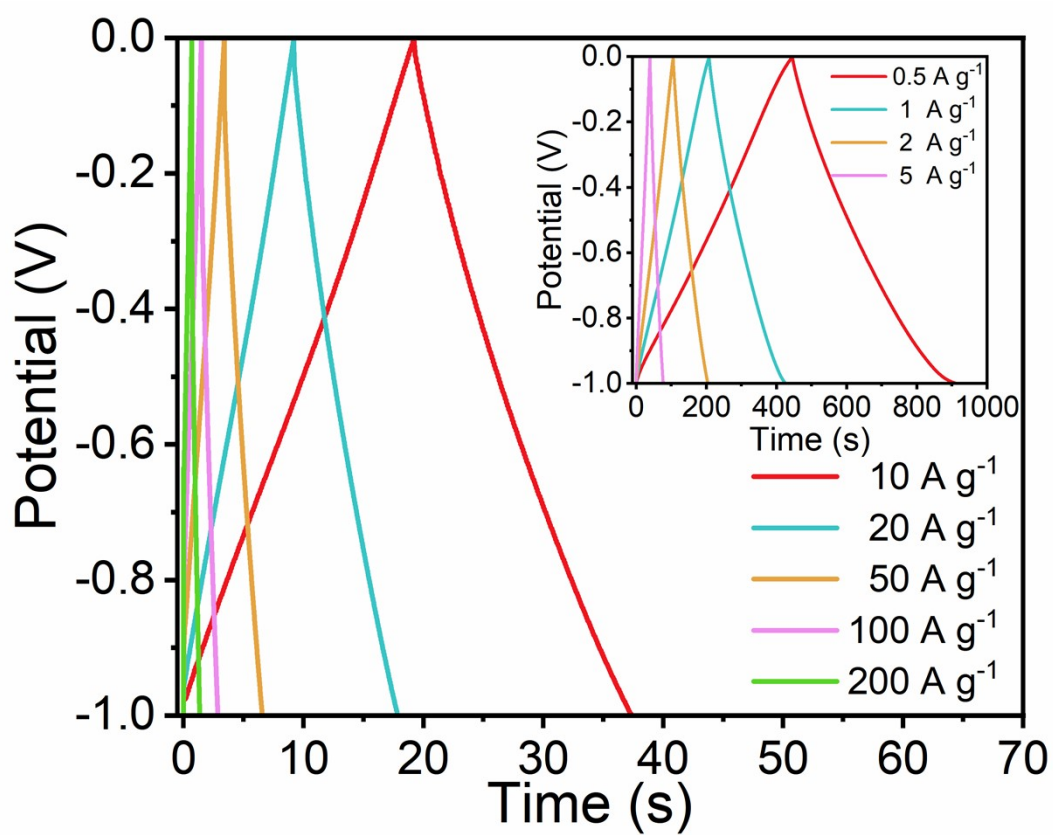

Fig. S12 GCD curves of PDKP-900 at different current densities.



**Table S3** Specific capacitances and rate capacities of PDKP-700, PDKP-800 and PDKP-900.

| Current density<br>(A g <sup>-1</sup> ) | Specific capacitance (F g <sup>-1</sup> ) and rate capacity (%) |          |          |
|-----------------------------------------|-----------------------------------------------------------------|----------|----------|
|                                         | PDKP-700                                                        | PDKP-800 | PDKP-900 |
| 0.5                                     | 245.8                                                           | 305.7    | 234.55   |
|                                         | 100%                                                            | 100%     | 100%     |
| 1                                       | 222.5                                                           | 297.3    | 217.6    |
|                                         | 90.5%                                                           | 97.3%    | 92.8%    |
| 2                                       | 204                                                             | 250.4    | 197.6    |
|                                         | 83%                                                             | 81.9%    | 84.2%    |
| 5                                       | 193                                                             | 233.5    | 187.5    |
|                                         | 78.5%                                                           | 76.4%    | 79.9%    |
| 10                                      | 186                                                             | 222.7    | 181      |
|                                         | 75.7%                                                           | 72.9%    | 77.2%    |
| 20                                      | 175.2                                                           | 210.6    | 172.8    |
|                                         | 71.3%                                                           | 68.9%    | 73.7%    |
| 50                                      | 158                                                             | 189.5    | 158      |
|                                         | 64.3%                                                           | 62%      | 67.4%    |
| 100                                     | 132.8                                                           | 170      | 137.4    |
|                                         | 54%                                                             | 55.6%    | 58.6%    |
| 200                                     | 111.2                                                           | 154      | 130      |
|                                         | 45.2%                                                           | 50.4%    | 55.4%    |

**Table S4** The comparison of the capacitance of carbon materials.

| Samples          | SSA [m <sup>2</sup> g <sup>-1</sup> ] | electrolyte                        | C <sub>g</sub> [F g <sup>-1</sup> ] | Ref.      |
|------------------|---------------------------------------|------------------------------------|-------------------------------------|-----------|
| PDKP-800         | 3352.8                                | 6 M KOH                            | 305.65 (0.5 A g <sup>-1</sup> )     | This work |
|                  |                                       |                                    | 210.6 (20 A g <sup>-1</sup> )       |           |
|                  |                                       |                                    | 170 (100 A g <sup>-1</sup> )        |           |
|                  |                                       |                                    | 154 (200 A g <sup>-1</sup> )        |           |
| PAN/Lignin-800-1 | 2041                                  | 6 M KOH                            | 325.7 (0.5 A g <sup>-1</sup> )      | 1         |
|                  |                                       |                                    | 182.2 (20 A g <sup>-1</sup> )       |           |
| HPCNFs-3-1       | 679                                   | 6 M KOH                            | 251 (0.5 A g <sup>-1</sup> )        | 2         |
|                  |                                       |                                    | 160 (20 A g <sup>-1</sup> )         |           |
| NPCNFs/PANI-1.0  | 285                                   | 1 M H <sub>2</sub> SO <sub>4</sub> | 275 (0.5 A g <sup>-1</sup> )        | 3         |
|                  |                                       |                                    | 165 (8 A g <sup>-1</sup> )          |           |
| HPCs-750         | 1579                                  | 6 M KOH                            | 314 (0.5 A g <sup>-1</sup> )        | 4         |
|                  |                                       |                                    | 237 (20 A g <sup>-1</sup> )         |           |
| PAN-C1           | 2348.7                                | 6 M KOH                            | 282.7 (0.5 A g <sup>-1</sup> )      | 5         |
|                  |                                       |                                    | 219 (10 A g <sup>-1</sup> )         |           |
| PPLCNFs-0.5g     | 364                                   | 6 M KOH                            | 233 (0.5 A g <sup>-1</sup> )        | 6         |
|                  |                                       |                                    | 127 (100 A g <sup>-1</sup> )        |           |
| HTPC             | 1508                                  | 6 M KOH                            | 278 (1 A g <sup>-1</sup> )          | 7         |
|                  |                                       |                                    | 248 (20 A g <sup>-1</sup> )         |           |
|                  |                                       |                                    | 208 (100 A g <sup>-1</sup> )        |           |
| HOMC             | 2033                                  | 6 M KOH                            | 286 (0.2 A g <sup>-1</sup> )        | 8         |
|                  |                                       |                                    | 206 (20 A g <sup>-1</sup> )         |           |

## References

1. Y. Ma, L. Li, X. Wei, C. Li, Q. Bai, Y. Shen and H. Uyama, Polyacrylonitrile-sodium lignosulfonate - derived nitrogen-doped three-dimensional hierarchical porous carbon for supercapacitors, *J. Ind. Eng. Chem.*, 2024, **134**, 495-503.
2. L. Zhang, Y. Jiang, L. Wang, C. Zhang and S. Liu, Hierarchical porous carbon nanofibers as binder-free electrode for high-performance supercapacitor, *Electrochim. Acta*, 2016, **196**, 189-196.
3. H. Sun, S. Li, Y. Shen, F. Miao, P. Zhang and G. Shao, Integrated structural design of polyaniline-modified nitrogen-doped hierarchical porous carbon nanofibers as binder-free electrodes toward all-solid-state flexible supercapacitors, *Appl. Surf. Sci.*, 2020, **501**, 144001.
4. L. Yao, G. Yang, P. Han, Z. Tang and J. Yang, Three-dimensional beehive-like hierarchical porous polyacrylonitrile-based carbons as a high performance supercapacitor electrodes, *J. Power Sources*, 2016, **315**, 209-217.
5. G. Shi, C. Liu, G. Wang, X. Chen, L. Li, X. Jiang, P. Zhang, Y. Dong, S. Jia, H. Tian, Y. Liu, Z. Wang, Q. Zhang and H. Zhang, Preparation and electrochemical performance of electrospun biomass-based activated carbon nanofibers, *Ionics*, 2018, **25**, 1805-1812.
6. D. Xuan, J. Liu, D. Wang, Z. Lu, Q. Liu, Y. Liu, S. Li and Z. Zheng, Facile Preparation of Low-Cost and Cross-Linked Carbon Nanofibers Derived from PAN/PMMA/Lignin as Supercapacitor Electrodes, *Energy Fuel*, 2020, **35**, 796-805.
7. W. Jiang, L. Li, J. Pan, R. A. Senthil, X. Jin, J. Cai, J. Wang and X. Liu, Hollow-tubular porous carbon derived from cotton with high productivity for enhanced performance supercapacitor, *J. Power Sources*, 2019, **438**, 226936.
8. Y. Liang, X. Liu and X. Qi, Hierarchical nanoarchitectonics of ordered mesoporous carbon from lignin for high-performance supercapacitors, *Int. J. Biol. Macromol.*, 2022, **213**, 610-620.
